# Supplementary material
Source: HighWire-hosted journal article supplement (https://bmjopen.bmj.com/content/7/12/e019215)

## **APPENDIX: Databases Search Scripts**

**Search Date:** 2017 March 24<sup>th</sup>

### **Filters :**

Language= English

Species=Human

Date = 1990 – Now

| <b>Items Found</b> | <b>Search Script</b>                                                                                                                                                                                                                                                                                                                                                                                                                                                          | <b>Database</b>       |
|--------------------|-------------------------------------------------------------------------------------------------------------------------------------------------------------------------------------------------------------------------------------------------------------------------------------------------------------------------------------------------------------------------------------------------------------------------------------------------------------------------------|-----------------------|
| 271                | (Tailor OR Tailored OR Tailoring OR Individualization OR Individualized OR Personalization OR Personalized OR Adapt OR Adapted) AND (Information OR Content OR Message OR Advice OR Recommendation OR Feedback OR education) AND (Computer OR Computer-Based OR PC OR expert system OR Mobile OR SMS OR Web OR internet) AND (Health OR Disease)                                                                                                                              | <b>PubMed</b>         |
| 524                | ( TITLE ( tailor OR tailored OR tailoring OR individualization OR individualized OR personalization OR personalized OR adapt OR adapted ) AND TITLE-ABS-KEY ( information OR content OR message OR advice OR recommendation OR feedback OR education ) AND TITLE-ABS-KEY ( computer OR computer-based OR pc OR expert AND system OR mobile OR SMS OR web OR internet ) AND TITLE-ABS-KEY ( health OR disease ) ) AND PUBYEAR > 1989 AND ( LIMIT-TO ( LANGUAGE , "English" ) ) | <b>Scopus</b>         |
| 372                | TITLE(Tailor OR Tailored OR Tailoring OR Individualization OR Individualized OR Personalization OR Personalized OR Adapt OR Adapted) and TITLE-ABSTR-KEY(((Information OR Content OR Message OR Advice OR Recommendation OR Feedback OR education) AND (Computer OR Computer-Based OR PC OR expert system OR Mobile OR SMS OR Web OR internet) AND (Health OR Disease))) AND LIMIT-TO(contenttype, "JL,BS", "Journal")                                                        | <b>Science Direct</b> |
| 70                 | ((individual* or tailor*) AND health or disease or patient) AND education or information or message)                                                                                                                                                                                                                                                                                                                                                                          | <b>IEEE*</b>          |
| 83                 | (Tailor OR Tailored OR Tailoring OR Individualization OR Individualized OR Personalization OR Personalized OR Adapt OR Adapted) AND (Information OR Content OR Message OR Advice OR Recommendation OR Feedback OR education) AND (Computer OR Computer-Based OR PC OR expert system OR Mobile OR SMS OR Web OR internet) AND (Health OR Disease)                                                                                                                              | <b>EBSCO</b>          |
| 1320               |                                                                                                                                                                                                                                                                                                                                                                                                                                                                               |                       |

\* There is a limitation of up to 15 search terms per search string in IEEE Xplore® Digital Library. Since this database is focused exclusively on the field of computing so we decided to abandon the keywords related to the concept of "ICT platform".

### **Frequency of retrieved articles in each database**

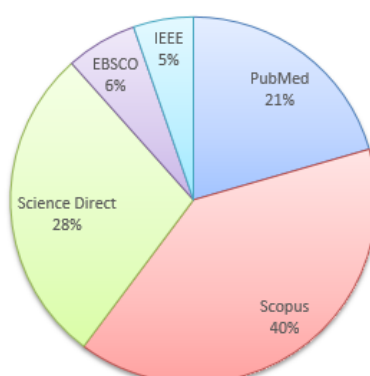

Supplement: inline-supplementary-material-1 [file inline-supplementary-material-1.pdf]
